# Supplementary material
Source: publisher figshare collection journal article supplement (https://springernature.figshare.com/ndownloader/files/7434220)
Supplement: Supplementary file [file 7434220]

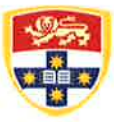

**QUESTIONS FOR REVIEWER SCORING PROPOSAL UPN 1**

*This questionnaire relates to proposal UPN: 1 which is provided below.*

**Clarity of the information provided**

1. How clear is the proposal about why the policy maker is commissioning the review?

*Please **circle or highlight in bold** the one response which most closely reflects your view.*

|                     |                      |                     |                   |       |               |
|---------------------|----------------------|---------------------|-------------------|-------|---------------|
| Not at<br>all clear | Not<br>very<br>clear | Somewhat<br>unclear | Somewhat<br>clear | Clear | Very<br>clear |
|---------------------|----------------------|---------------------|-------------------|-------|---------------|

2. How clearly articulated are the questions to be answered in this review?

*Please **circle or highlight in bold** the one response which most closely reflects your view.*

|                          |                        |                       |                     |         |                 |
|--------------------------|------------------------|-----------------------|---------------------|---------|-----------------|
| Not at<br>all<br>clearly | Not<br>very<br>clearly | Somewhat<br>unclearly | Somewhat<br>clearly | Clearly | Very<br>clearly |
|--------------------------|------------------------|-----------------------|---------------------|---------|-----------------|

3. How clearly described is the scope of the review?

*Please **circle or highlight in bold** the one response which most closely reflects your view.*

|                          |                        |                       |                     |         |                 |
|--------------------------|------------------------|-----------------------|---------------------|---------|-----------------|
| Not at<br>all<br>clearly | Not<br>very<br>clearly | Somewhat<br>unclearly | Somewhat<br>clearly | Clearly | Very<br>clearly |
|--------------------------|------------------------|-----------------------|---------------------|---------|-----------------|

4. How clearly described is the method of the review?

*Please **circle or highlight in bold** the one response which most closely reflects your view.*

|                          |                        |                       |                     |         |                 |
|--------------------------|------------------------|-----------------------|---------------------|---------|-----------------|
| Not at<br>all<br>clearly | Not<br>very<br>clearly | Somewhat<br>unclearly | Somewhat<br>clearly | Clearly | Very<br>clearly |
|--------------------------|------------------------|-----------------------|---------------------|---------|-----------------|

5. How clear is the proposal about what should be included in the reported?

*Please **circle or highlight in bold** the one response which most closely reflects your view.*

|                     |                      |                     |                   |       |               |
|---------------------|----------------------|---------------------|-------------------|-------|---------------|
| Not at<br>all clear | Not<br>very<br>clear | Somewhat<br>unclear | Somewhat<br>clear | Clear | Very<br>clear |
|---------------------|----------------------|---------------------|-------------------|-------|---------------|

**Overall level of confidence**

6. Based on the information provided in the proposal, how confident are you that a researcher in this field will know enough to provide a rapid review of the literature that will meet the policy maker's needs?

*Please **circle or highlight in bold** the one response which most closely reflects your view.*

|                         |                       |                         |                       |           |                   |
|-------------------------|-----------------------|-------------------------|-----------------------|-----------|-------------------|
| Not at all<br>confident | Not very<br>confident | Somewhat<br>unconfident | Somewhat<br>confident | Confident | Very<br>confident |
|-------------------------|-----------------------|-------------------------|-----------------------|-----------|-------------------|

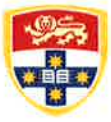

7. Is there anything else you would like to tell us?

*Please add comments here.*
